# Supplementary material for: Protective role of thymoquinone in hyperlipidemia-induced liver injury in LDL-R−/−mice
Source: Springer Nature journal article supplement (doi:10.1186/s12876-023-02895-0), 2023-08-11
Supplement: MOESM1 [file 25914162]

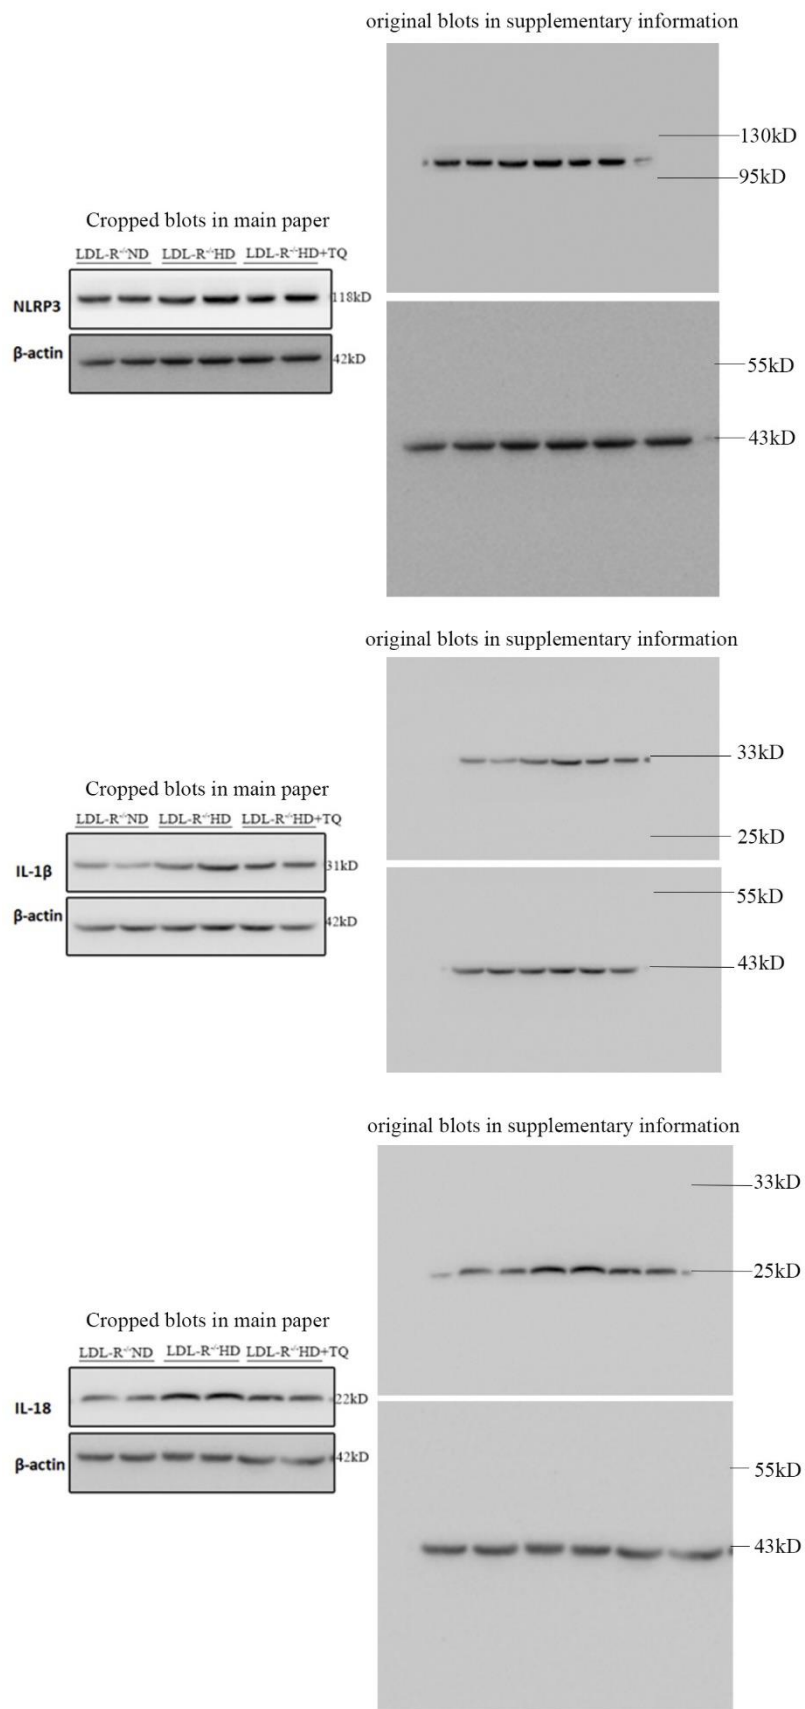

Figure S6. The NLRP3, IL-1 $\beta$ , and IL-18 original gels.

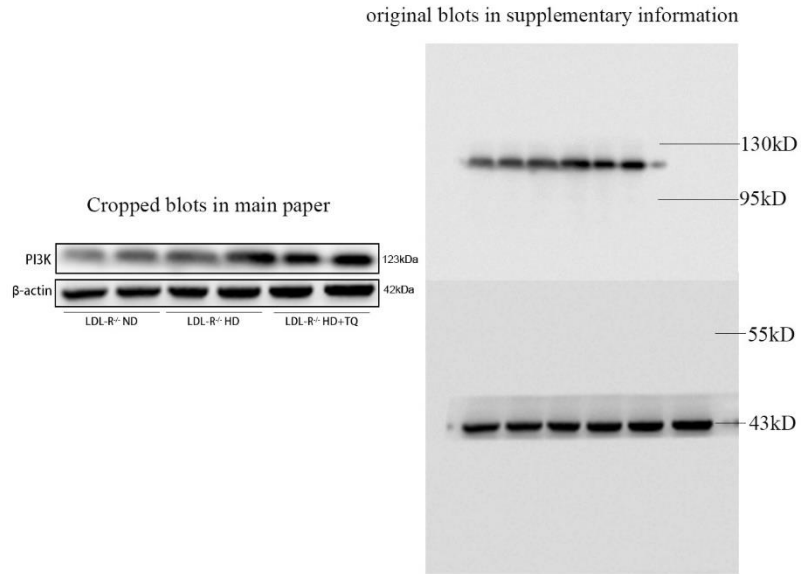

Figure S7. The PI3K original gels.
